# Supplementary material for: Identification of a potent ionizable lipid for efficient macrophage transfection and systemic anti-interleukin-1β siRNA delivery against acute liver failure
Source: Royal Society of Chemistry journal article supplement (doi:10.1039/d1tb00736j), 2021-01-01
Supplement: d1tb00736j1.pdf [file d1tb00736j1.pdf]

## Supporting Information

### Identification of a potent ionizable lipid for efficient macrophage transfection and systemic anti-Interleukin-1 $\beta$ siRNA delivery against acute liver failure

Feng Ding, Hongqian Zhang, Qiang Li, Chuanxu Yang\*

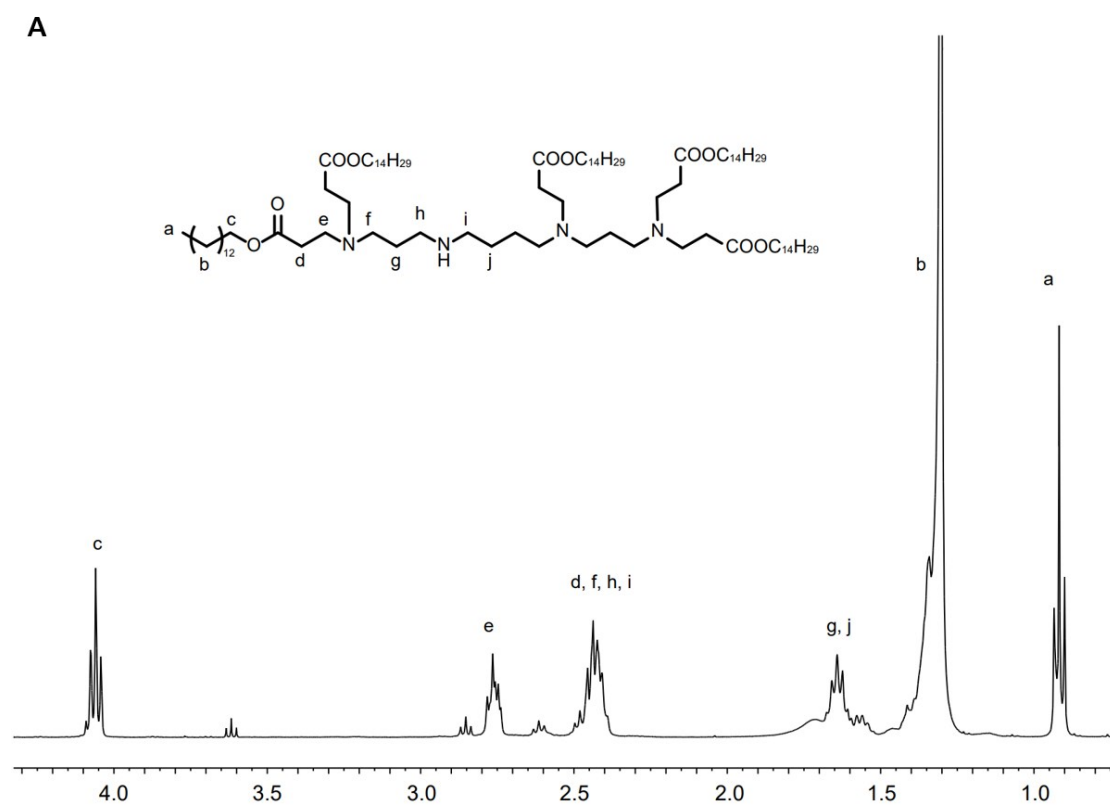

**B**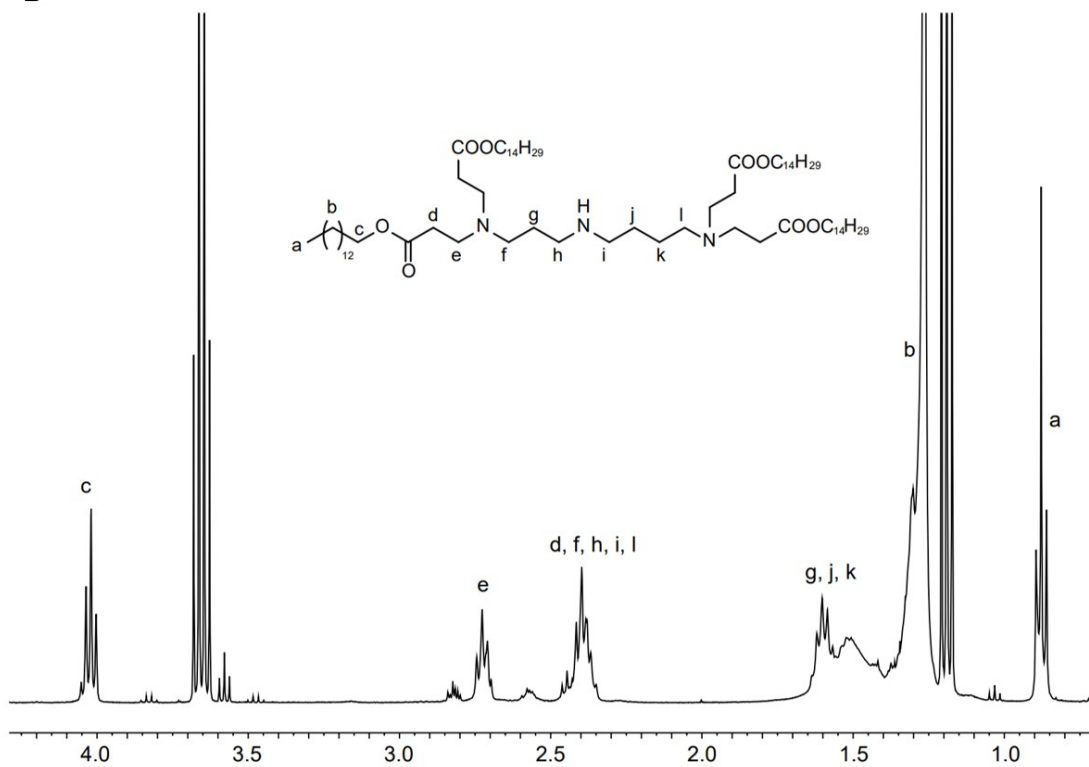**C**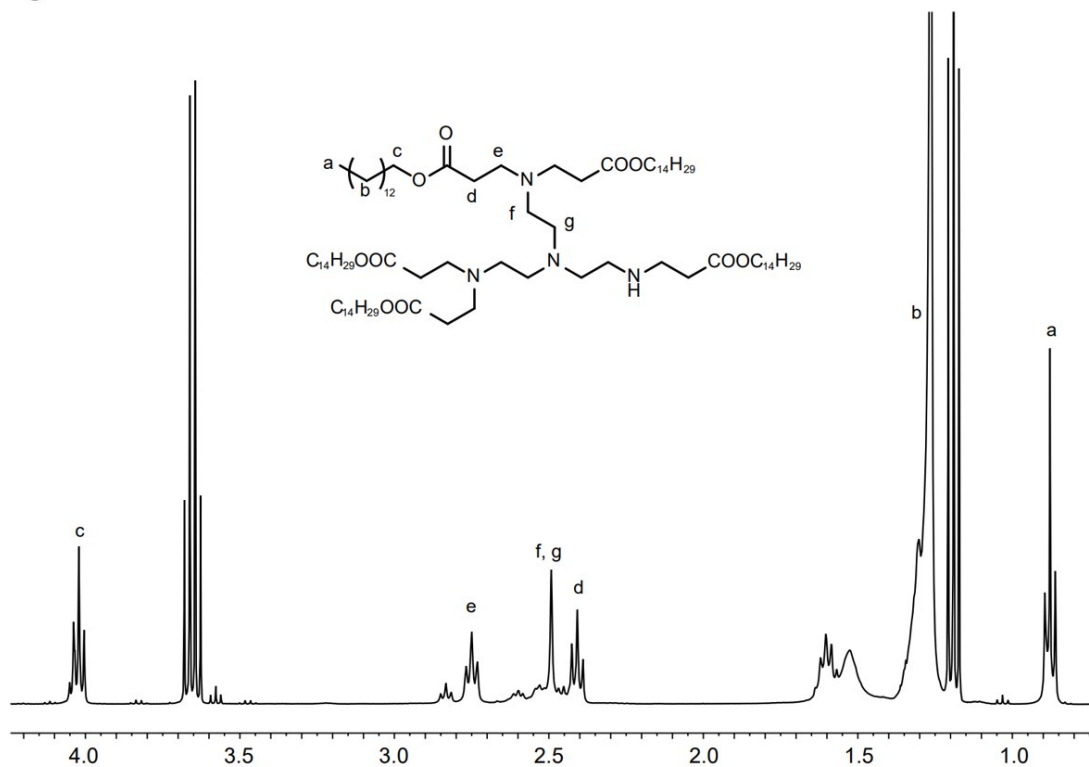

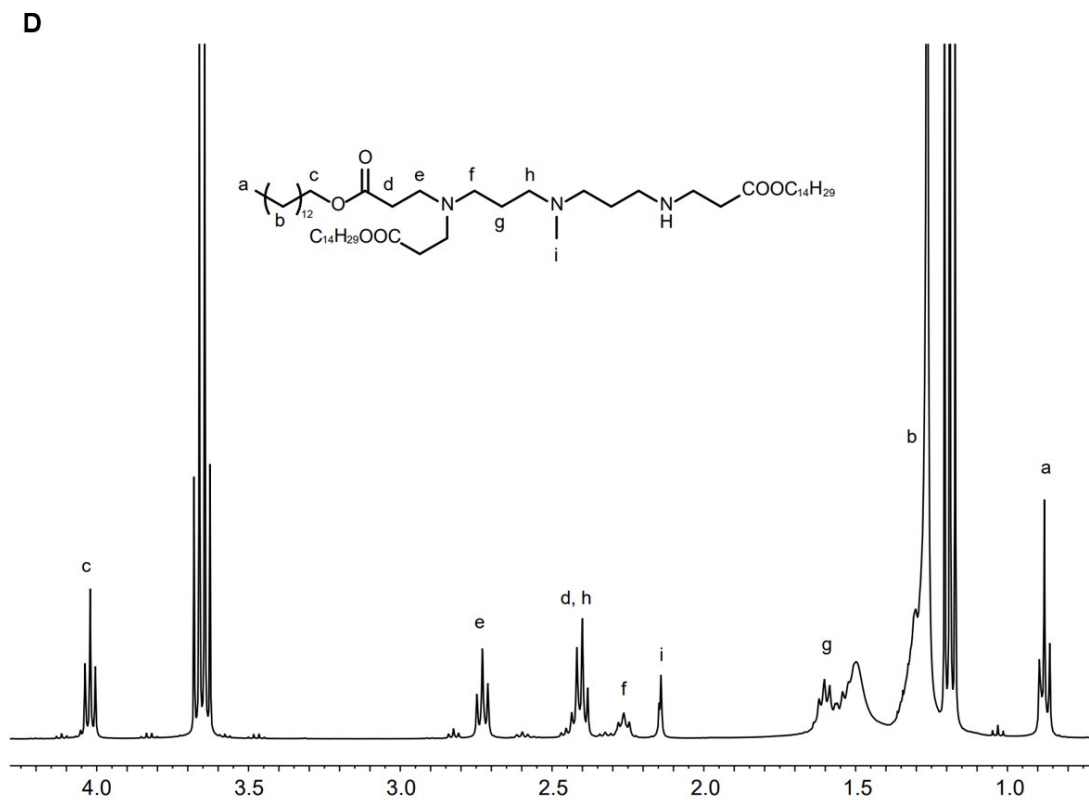

**Figure S1.**  $^1\text{H}$  NMR spectrum of ionizable lipid-like material 114 (A), 214 (B), 314 (C), 414 (D) in  $\text{CD}_2\text{Cl}_2$ .

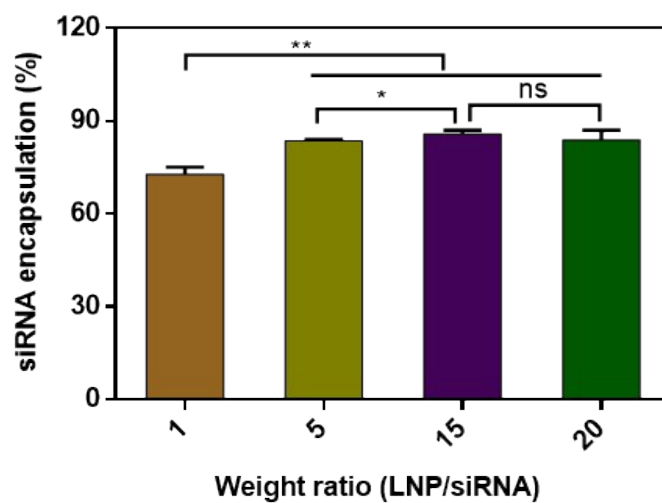

**Figure S2.** siRNA encapsulation efficiency of 114-LNP at different weight ratios. Data are expressed as means  $\pm$  SD,  $n=3$ . Significance: \*  $P < 0.05$ ; \*\* $P < 0.01$ ; ns, not significant.

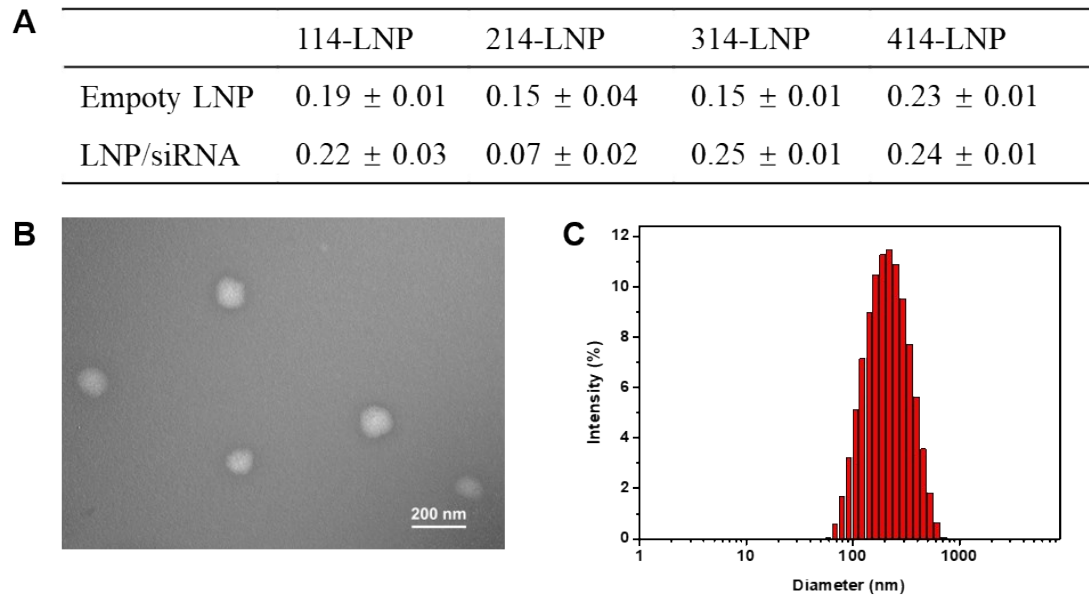

**Figure S3.** Characterization of ionizable lipid nanoparticles (LNPs). (A) The polydispersity index (PDI) value of LNPs and LNP/siRNA complex. (B) TEM images of LNP-114/siRNA complex. (C) The size histogram of 114-LNP/siRNA complex.

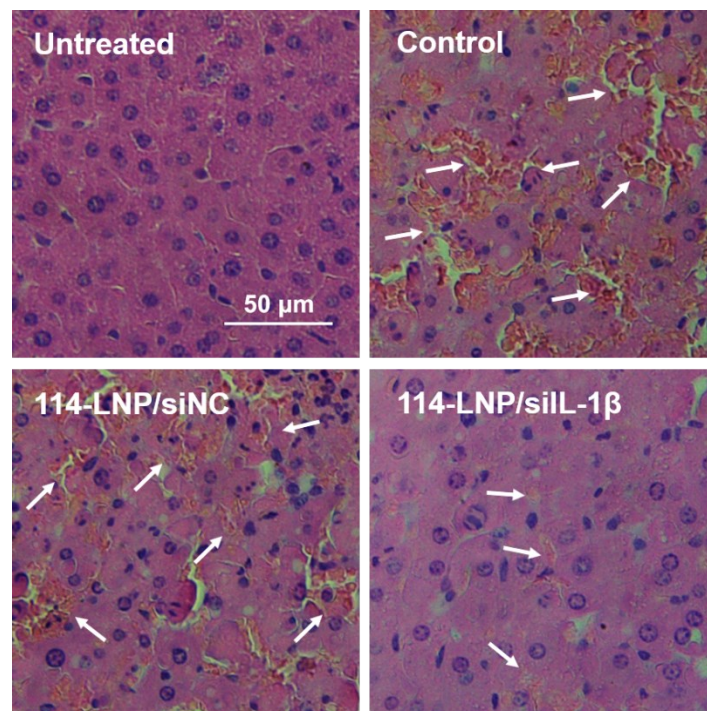

**Figure S4.** H&E staining of livers sections from LPS/D-GalN induced mice receiving 114-LNP/siIL-1 $\beta$  complexes. Untreated, health mice without treatment; Control, liver injured mice without treatment. White arrow indicates tissue lesion.

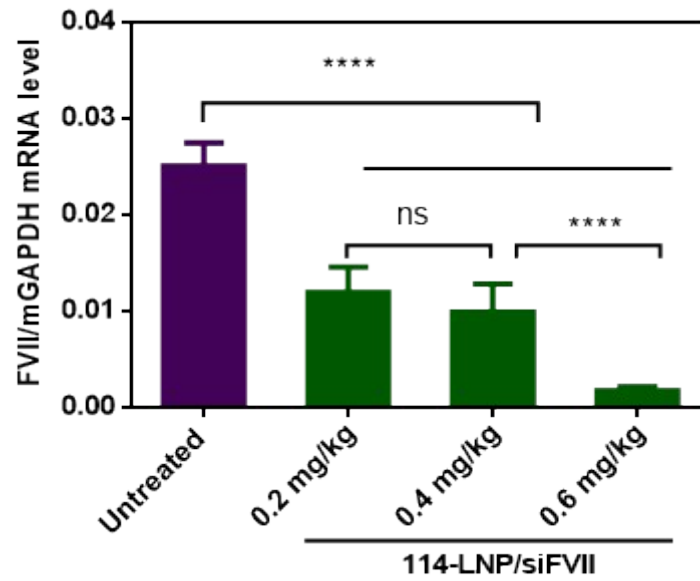

**Figure S5.** Gene silencing efficiency of 114-LNP/siFVII in liver at siRNA dose of 0.2, 0.4 or 0.6 mg/kg, respectively. Mice without injection was included as untreated control. Results represent mean  $\pm$  SD (n = 3).
